# Supplementary material for: Dependence of Proximal GC Boxes and Binding Transcription Factors in the Regulation of Basal and Valproic Acid-Induced Expression of t-PA
Source: Hindawi journal article supplement (doi:10.1155/2016/7928681), 2016-01-01
Supplement: f1 [file 7928681.f1.pdf]

# Article: Dependence of Proximal GC-boxes and Binding Transcription Factors in the Regulation of Basal and Valproic Acid-Induced Expression of t-PA

Journal: International Journal of Vascular Medicine

Erik Ulfhammer<sup>1</sup>, Pia Larsson<sup>1</sup>, Mia Magnusson<sup>1</sup>, Lena Karlsson<sup>1</sup>, Niklas Bergh<sup>1</sup> and Sverker Jern<sup>1</sup>

<sup>1</sup>The Wallenberg Laboratory for Cardiovascular Research, Institute of Medicine,

The Sahlgrenska Academy, University of Gothenburg, Gothenburg, Sweden.

Correspondence to: Sverker Jern, M.D., E-mail: [sverker.jern@gu.se](mailto:sverker.jern@gu.se)

## Online Resource 1. Regulation of Sp and KLF transcription factors by VPA in HUVEC and presentation of selected proteins for siRNA studies

A.

| Gene  | Fold change |
|-------|-------------|
| sp1   | 0.96        |
| sp2   | 0.72        |
| sp3   | 1.04        |
| sp4   | 1.26        |
| sp5   | 1.05        |
| sp6   | 1.20        |
| sp7   | 0.97        |
| sp8   | 0.96        |
| sp9   | 1.02        |
| KLF1  | 1.06        |
| KLF2  | 0.98        |
| KLF3  | 1.10        |
| KLF4  | 1.31        |
| KLF5  | 1.33        |
| KLF6  | 0.98        |
| KLF7  | 1.03        |
| KLF8  | 1.03        |
| KLF9  | 1.30        |
| KLF10 | 0.69        |
| KLF11 | 0.91        |
| KLF12 | 1.08        |
| KLF13 | 1.23        |
| KLF14 | 1.00        |
| KLF15 | 0.99        |
| KLF16 | 1.00        |
| KLF17 | 0.93        |

B.

| Gene  | Selection criteria                  | siRNA            | Gene Expression Assay |
|-------|-------------------------------------|------------------|-----------------------|
| sp1   | Endothelial described, t-PA context | L-026959-00-0005 | Hs00916521_m1         |
| sp2   | Regulated                           | L-015955-00-0005 | Hs00370726_m1         |
| sp3   | Endothelial described, t-PA context | L-023096-00-0005 | Hs01595811_m1         |
| sp4   | Regulated                           | L-006562-00-0005 | Hs00162095_m1         |
| KLF2  | Endothelial described               | L-006928-00-0005 | Hs00360439_g1         |
| KLF4  | Regulated, Endothelial described    | L-005089-00-0005 | Hs00358836_m1         |
| KLF5  | Regulated                           | L-013571-00-0005 | Hs00156145_m1         |
| KLF6  | Endothelial described               | L-021441-00-0005 | Hs00810569_m1         |
| KLF9  | Regulated                           | L-011223-00-0005 | Hs00230918_m1         |
| KLF10 | Regulated                           | L-006566-00-0005 | Hs00921811_m1         |
| KLF13 | Regulated                           | L-006994-00-0005 | Hs00429818_m1         |
| KLF15 | Endothelial described               | L-006975-00-0005 | Hs00362736_m1         |

C.

| Gene | siRNA            | Gene Expression Assay |
|------|------------------|-----------------------|
| p300 | L-003486-00-0005 | Hs_EP300_1_SG         |
| PCAF | L-005055-00-0005 | Hs00187332_m1         |

A. HUVECs (n=4) were stimulated with 4 mM VPA for 24 h and analyzed by microarray for alteration in gene expression. The table shows expression of all characterized Sp and KLF transcription factors [1, 2] relative to untreated control cells. Data from these experiments were recently presented elsewhere [3] and the total set of raw data are available at <http://www.ncbi.nlm.nih.gov/geo/query/acc.cgi?token=dnglzumweoisshk&acc=GSE23909>.

B. Selected Sp and KLF factors for siRNA knock down studies. The selection criteria was either significantly regulated ( $p < 0.001$ ) by VPA in microarray experiments [3] or previously described in an endothelial gene regulation context; Sp1 [4], Sp3 [5], KLF2 [6], KLF4 [7], KLF6 [8], KLF15 [9]. The table also shows product numbers of used siRNA (Dharmacon) and gene expression assays (Applied Biosystems). C. Products used for siRNA (Dharmacon) depletion of p300 and PCAF as well as gene expression assays for p300 (Qiagen) and PCAF (Applied Biosystems).

#### **References:**

1. McConnell BB, Yang VW (2010) Mammalian Kruppel-like factors in health and diseases. *Physiol Rev* 90(4):1337-1381.
2. Wierstra I (2008) Sp1: emerging roles--beyond constitutive activation of TATA-less housekeeping genes. *Biochem Biophys Res Commun* 372(1):1-13.
3. Larsson P, Ulfhammer E, Magnusson M, Bergh N, Lunke S, El-Osta A, Medcalf RL, Svensson PA, Karlsson L, Jern S (2012) Role of histone acetylation in the stimulatory effect of valproic acid on vascular endothelial tissue-type plasminogen activator expression. *PLoS One* 7(2):e31573.
4. Arts J, Herr I, Lansink M, Angel P, Kooistra T (1997) Cell-type specific DNA-protein interactions at the tissue-type plasminogen activator promoter in human endothelial and HeLa cells in vivo and in vitro. *Nucleic Acids Res* 25(2):311-317.

5. Merchiers P, Bulens F, De Vriese A, Collen D, Belayew A (1999) Involvement of Sp1 in basal and retinoic acid induced transcription of the human tissue-type plasminogen activator gene. *FEBS Lett* 456(1):149-154.
6. Kuo CT, Veselits ML, Barton KP, Lu MM, Clendenin C, Leiden JM (1997) The LKLF transcription factor is required for normal tunica media formation and blood vessel stabilization during murine embryogenesis. *Genes Dev* 11(22):2996-3006.
7. Yet SF, McA'Nulty MM, Folta SC, Yen HW, Yoshizumi M, Hsieh CM, Layne MD, Chin MT, Wang H, Perrella MA, Jain MK, Lee ME (1998) Human EZF, a Kruppel-like zinc finger protein, is expressed in vascular endothelial cells and contains transcriptional activation and repression domains. *J Biol Chem* 273(2):1026-1031.
8. Kojima S, Hayashi S, Shimokado K, Suzuki Y, Shimada J, Crippa MP, Friedman SL (2000) Transcriptional activation of urokinase by the Kruppel-like factor Zf9/COPEB activates latent TGF-beta1 in vascular endothelial cells. *Blood* 95(4):1309-1316.
9. Helbing T, Volkmar F, Goebel U, Heinke J, Diehl P, Pahl HL, Bode C, Patterson C, Moser M (2010) Kruppel-like factor 15 regulates BMPER in endothelial cells. *Cardiovasc Res* 85(3):551-559.
